# Supplementary material for: Comprehensive Evaluation of Morpho-Physiological and Ionic Traits in Wheat (Triticum aestivum L.) Genotypes under Salinity Stress
Source: MDPI journal article supplement (doi:10.3390/agriculture12111765), 2022-10-25

**Figure S1:** Frequency distribution histogram of 25 traits measured at vegetative stage among the 44 wheat genotypes; A) CHL: chlorophyll, B) MSI: membrane stability index, C) RFW: Root fresh weight, D) SFW: Shoot fresh weight, E) RDW: Root dry weight, F) SDW: Shoot dry weight, G) RL: Root length, H) SL: Shoot length, I) PS: Photosynthetic rate, J) R/S: Root/shoot ratio, K) TFW: Total fresh weight, L) TDW: Total dry weight, , M) RWC\_S: Relative water content of shoot, N) RWC\_R: Relative water content of root, O) RWC\_T: Total Relative water content, P) Shoot  $\text{Na}^+$ , Q) Root  $\text{Na}^+$ , R) Shoot  $\text{K}^+$ , S) Root  $\text{K}^+$ , T) Shoot  $\text{Ca}^{2+}$ , U) Root  $\text{Ca}^{2+}$ , V)  $\text{K}^+/\text{Na}^+$ \_S, W)  $\text{K}^+/\text{Na}^+$ \_R, X)  $\text{Na}^+/\text{Ca}^{2+}$ \_S, and Y)  $\text{Na}^+/\text{Ca}^{2+}$ \_R

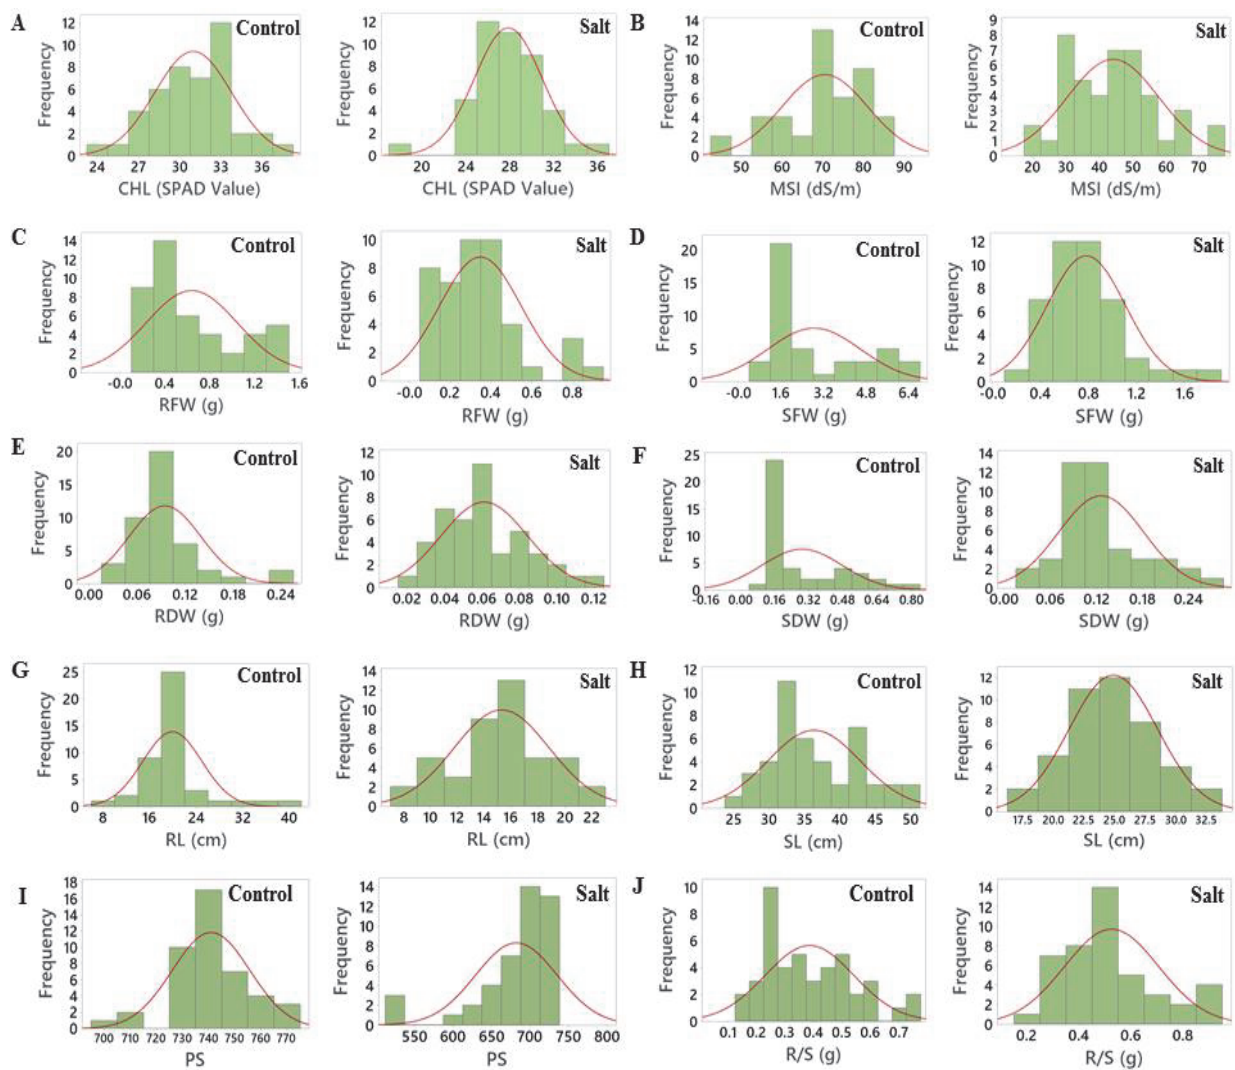

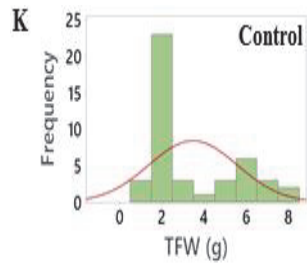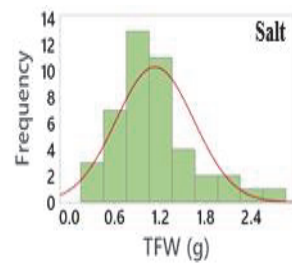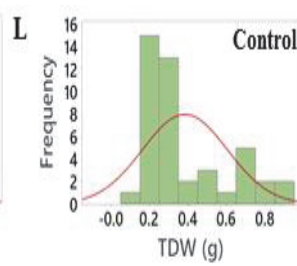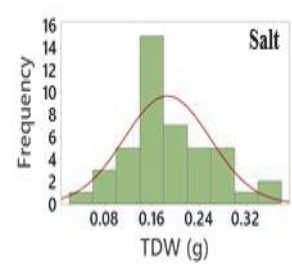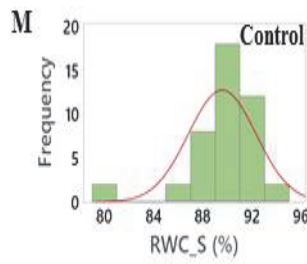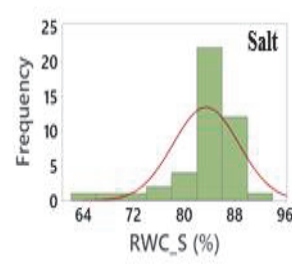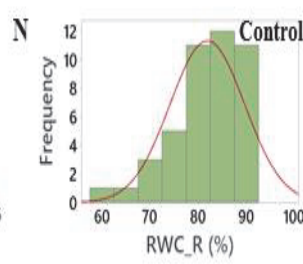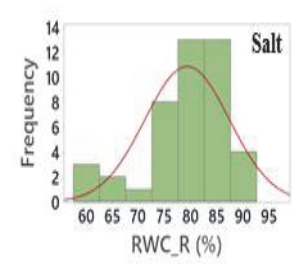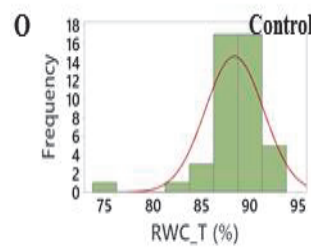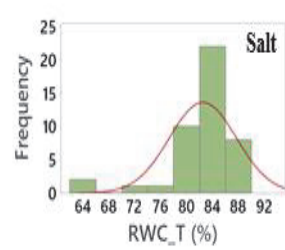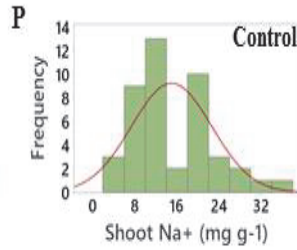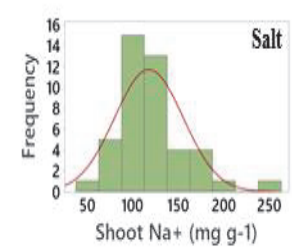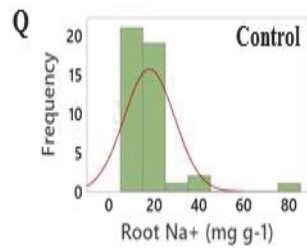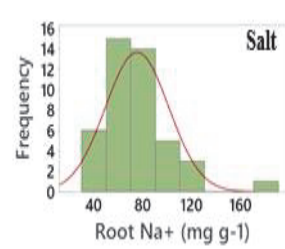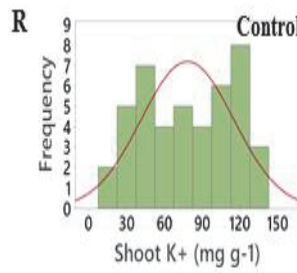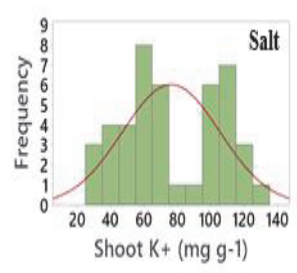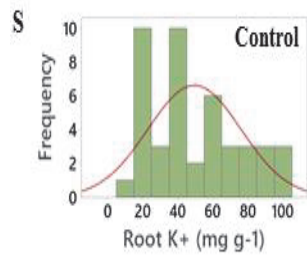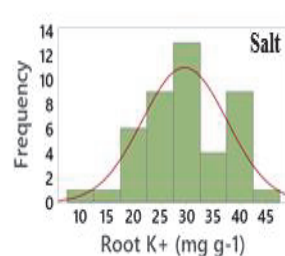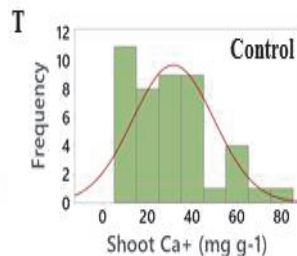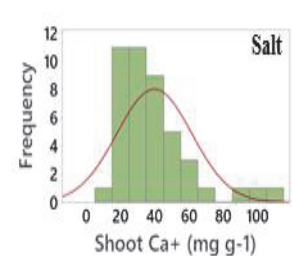

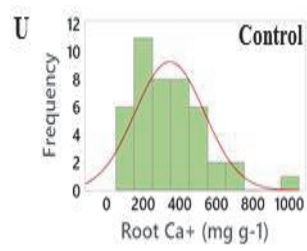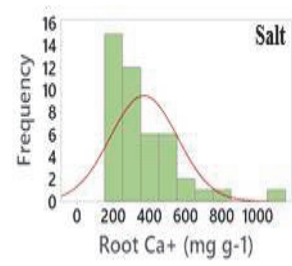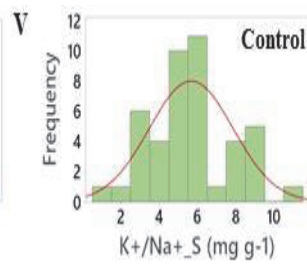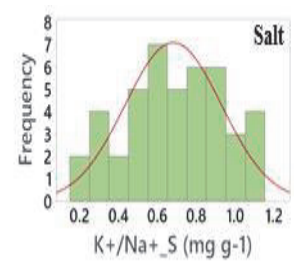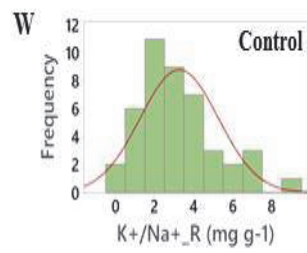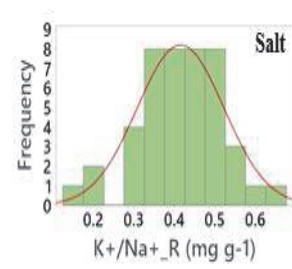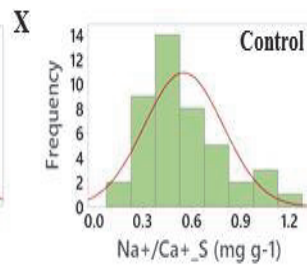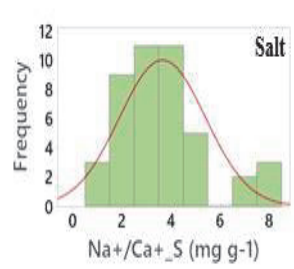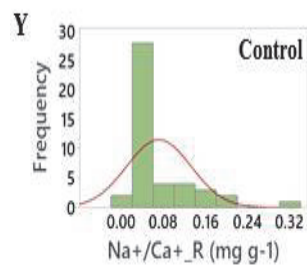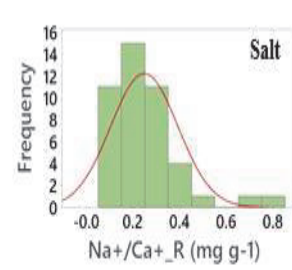

Supplement: s1 [file s1]
