# Supplementary material for: Comprehensive Evaluation of Morpho-Physiological and Ionic Traits in Wheat (Triticum aestivum L.) Genotypes under Salinity Stress
Source: MDPI journal article supplement (doi:10.3390/agriculture12111765), 2022-10-25
Supplement: s1 [file s1]

**Table S1:** Details of germplasm material of the 44 wheat accessions used in this study

| <b>SL. No.</b> | <b>Accession</b> | <b>Collector No/Other ID/Cultivar name/Pedigree</b>             | <b>Collection source/ developer institution /country</b>          |
|----------------|------------------|-----------------------------------------------------------------|-------------------------------------------------------------------|
| 1              | EC576886         | E-7220                                                          | CIMMYT, Mexico                                                    |
| 2              | IC279230         | Tro Elite line (FRL-387)                                        | Jammu and Kashmir                                                 |
| 3              | KRL 210          | Released variety (PBW-65/2*PASTOR)                              | Central Soil Salinity Research Institute (CSSRI), Karnal, Haryana |
| 4              | IC529195         | Local germplasm (Collector ID:VWFW-2138)                        | Uttarakhand                                                       |
| 5              | IC533742         | Local germplasm collection (Collector ID:B-1-C-2)               | ICAR-NBPGR, New Delhi                                             |
| 6              | IC539469         | EIGN-1(03-04)/50                                                | Haryana                                                           |
| 7              | IC542040         | 8-EGPSN-115, a line of Eastern Gangetic Plain Screening Nursery | ICAR-NBPGR, New Delhi                                             |
| 8              | IC82216          | NKG-129                                                         | Himachal Pradesh                                                  |
| 9              | EC178071-428     | Germplasm introduced from Mexico                                | CIMMYT, Mexico                                                    |
| 10             | IC543390         | Elite wheat line                                                | Himachal Pradesh                                                  |
| 11             | IC281570         | Elite wheat line (VR-CW-1660)                                   | Uttarakhand                                                       |
| 12             | IC535225         | NC-55621                                                        | CIMMYT, Mexico                                                    |
| 13             | EC498425         | SERI.1B/KAUZ/GEN/3/AMAD                                         | Mexico                                                            |
| 14             | EC178071-283     | Germplasm introduced from Mexico                                | CIMMYT, Mexico                                                    |
| 15             | IC290188         | Germplasm collection                                            | NBPGR, New Delhi                                                  |
| 16             | IC512662         | PI615325                                                        | United States of America                                          |
| 17             | IC82247          | Germplasm collection                                            | NBPGR, New Delhi                                                  |
| 18             | IC252799         | K-9441                                                          | CSUA&T, Kanpur                                                    |
| 19             | EC178071-434     | Germplasm introduced from Mexico                                | CIMMYT, Mexico                                                    |
| 20             | IC534688         | PI-322100                                                       | NBPGR, New Delhi                                                  |

|    |          |                                                   |                                               |
|----|----------|---------------------------------------------------|-----------------------------------------------|
| 21 | IC107946 | BDJ89-342                                         | Himachal Pradesh                              |
| 22 | IC529729 | VVFW-753                                          | Uttarakhand                                   |
| 23 | IC138901 | BDJ-89-2                                          | NBPGR, New Delhi                              |
| 24 | IC177789 | BW 4021                                           | CIMMYT, Mexico                                |
| 25 | IC104622 | CH-79-1/ Local cultivar hybrid                    | Haryana                                       |
| 26 | IC539574 | KYZ-0142                                          | IIWBR, Karnal, Haryana                        |
| 27 | IC542090 | 13HMN05-23-1                                      | Delhi                                         |
| 28 | IC290081 | Germplasm collection                              | NBPGR, New Delhi                              |
| 29 | IC445343 | ET-96265                                          | Karnal, Haryana                               |
| 30 | IC82209  | Germplasm collection                              | NBPGR, New Delhi                              |
| 31 | HD2009   | Released variety (Nainari 60 X Lerma)             | Indian Agricultural Research Institute, Delhi |
| 32 | IC104581 | Local germplasm collection (Collector ID:CH-42-1) | Chittorgarh, Rajasthan                        |
| 33 | IC532075 | P-2477-1                                          | NBPGR, New Delhi                              |
| 34 | IC290260 | MP-867-1                                          | Himachal Pradesh                              |
| 35 | IC535678 | Germplasm collection                              | NBPGR, New Delhi                              |
| 36 | EC553089 | KCM-986 Elite line                                | Uttarakhand                                   |
| 37 | IC532149 | P-2855                                            | ICAR-NBPGR, New Delhi                         |
| 38 | IC290221 | Germplasm collection                              | NBPGR, New Delhi                              |
| 39 | IC536084 | Germplasm collection                              | NBPGR, New Delhi                              |
| 40 | EC576356 | E-209-1-1                                         | CIMMYT, Mexico                                |
| 41 | IC406521 | AKS/RRA/BS-171 Elite line                         | Uttarakhand                                   |
| 42 | EC576404 | E-2293-1-1                                        | CIMMYT, Mexico                                |
| 43 | IC533596 | PI-343434                                         | NBPGR, New Delhi                              |

|    |          |                    |        |
|----|----------|--------------------|--------|
| 44 | EC192829 | B.V.-86 SI.No:1588 | MEXICO |
|----|----------|--------------------|--------|
