# Supplementary material for: Comprehensive Evaluation of Morpho-Physiological and Ionic Traits in Wheat (Triticum aestivum L.) Genotypes under Salinity Stress
Source: MDPI journal article supplement (doi:10.3390/agriculture12111765), 2022-10-25

**Figure S3:** The correlations between STI (salt tolerance index) based on total dry weight (TDW) and shoot  $K^+$ , root  $Ca^{2+}$ , shoot  $K^+/Na^+$  ratio as well as root  $Na^+/Ca^{2+}$  ratio under salt stress (150 mM, 32 days). A) Correlation between STI and shoot  $K^+$  content; B) correlation between STI and root  $Ca^{2+}$  content; C) correlation between STI and shoot  $K^+/Na^+$  ratio; D) correlation between STI and root  $Na^+/Ca^{2+}$  ratio.

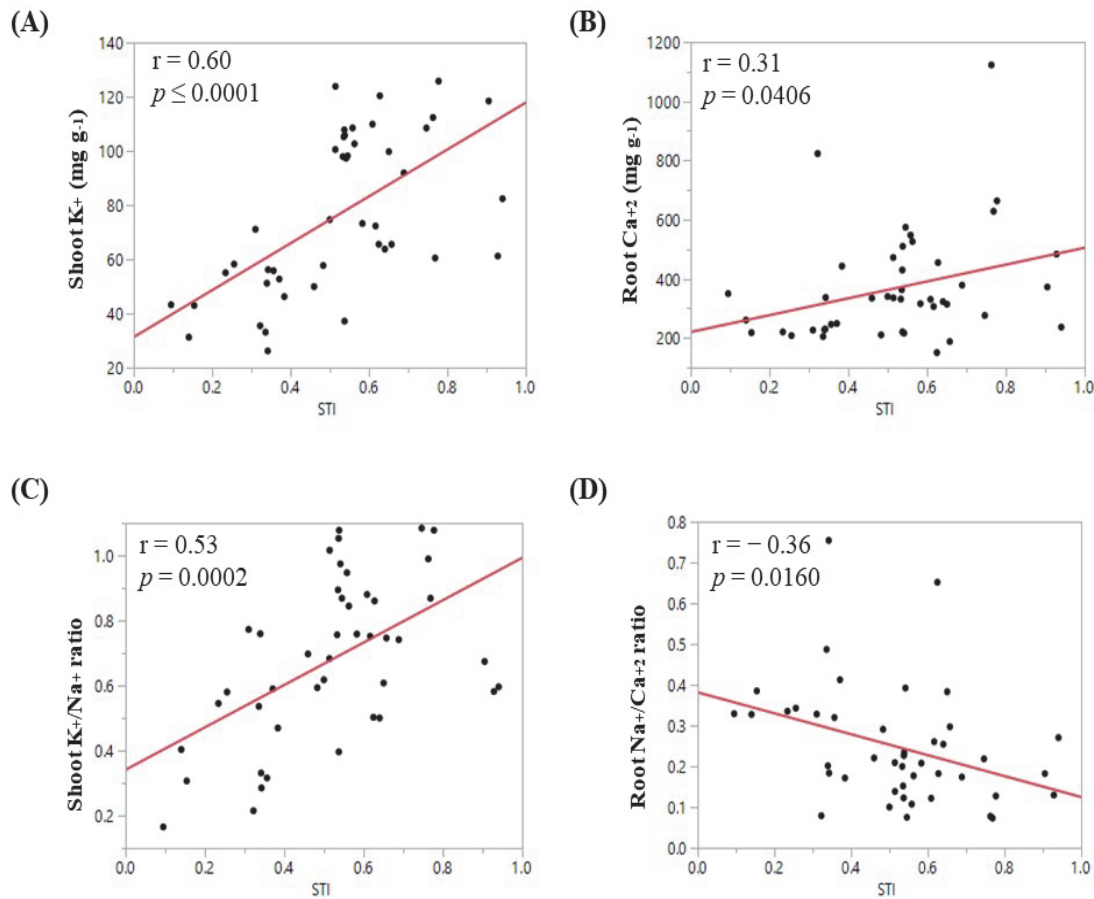

Supplement: s1 [file s1]
