# Supplementary material for: Comprehensive Evaluation of Morpho-Physiological and Ionic Traits in Wheat (Triticum aestivum L.) Genotypes under Salinity Stress
Source: MDPI journal article supplement (doi:10.3390/agriculture12111765), 2022-10-25
Supplement: s1 [file s1]

**Table S3:** Coefficients of correlation (r) between the fifteen morpho-physiological traits and nine ionic traits along with salt tolerance index (STI) evaluated at 150 mM NaCl (significant at  $p \leq 0.05$ ,  $p \leq 0.01$  and  $p \leq 0.0001$  respectively).

[illegible]
