# Supplementary material for: Comprehensive Evaluation of Morpho-Physiological and Ionic Traits in Wheat (Triticum aestivum L.) Genotypes under Salinity Stress
Source: MDPI journal article supplement (doi:10.3390/agriculture12111765), 2022-10-25

**Figure S2:** Principal components analysis of 25 salt tolerance traits. The arrow represented the direction of the trait and the gradient colors represent the contribution of each trait to the components.

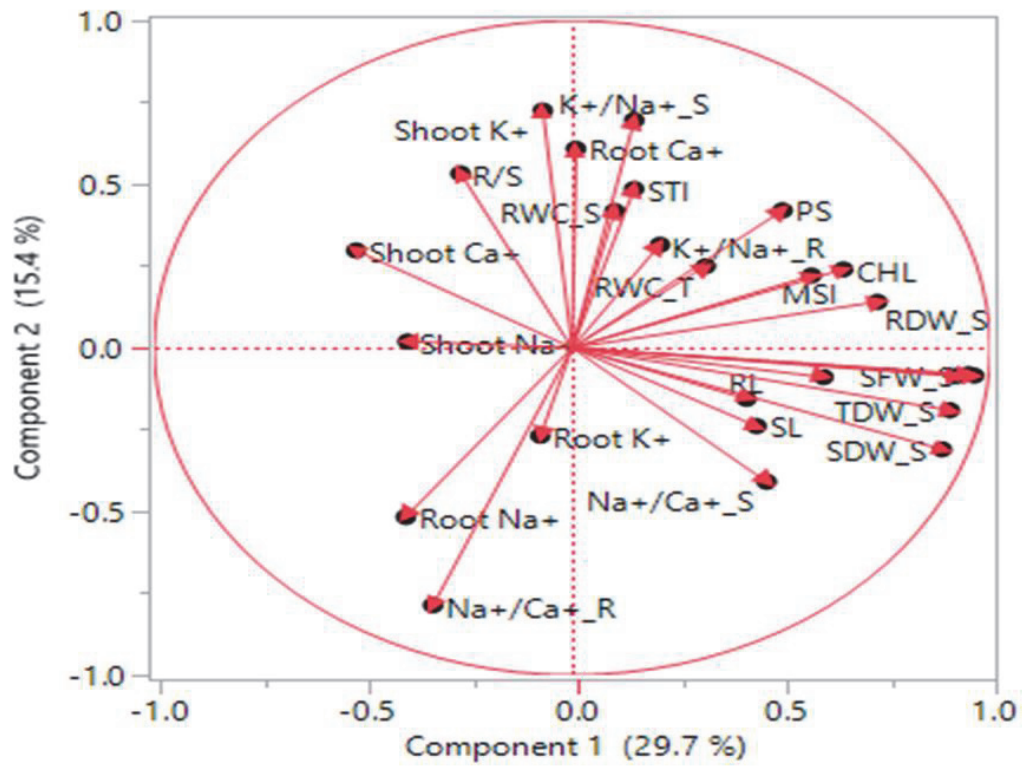

Supplement: s1 [file s1]
