# Supplementary material for: Comprehensive Evaluation of Morpho-Physiological and Ionic Traits in Wheat (Triticum aestivum L.) Genotypes under Salinity Stress
Source: MDPI journal article supplement (doi:10.3390/agriculture12111765), 2022-10-25
Supplement: s1 [file s1]

**Table S4:** Prediction screening showing the contribution of different traits among the wheat genotypes under salt stress condition.

| Traits                                                                                                                        | Contribution | Portion |       | Rank |
|-------------------------------------------------------------------------------------------------------------------------------|--------------|---------|-------|------|
| Shoot K <sup>+</sup>                                                                                                          | 4716.38      | 19.13   | +++++ | 1    |
| MSI                                                                                                                           | 3058.19      | 12.4    | +++++ | 2    |
| RWC_R                                                                                                                         | 2543.49      | 10.32   | +++++ | 3    |
| Root Ca <sup>+</sup>                                                                                                          | 2303.86      | 9.34    | +++++ | 4    |
| Na <sup>+</sup> /Ca <sup>+</sup> _R                                                                                           | 1905.54      | 7.73    | +++++ | 5    |
| Root K <sup>+</sup>                                                                                                           | 1832.26      | 7.43    | +++++ | 6    |
| PS                                                                                                                            | 1493.45      | 6.06    | +++   | 7    |
| R/S                                                                                                                           | 1172.85      | 4.76    | ++    | 8    |
| RWC_T                                                                                                                         | 917.11       | 3.72    | ++    | 9    |
| RWC_S                                                                                                                         | 554.56       | 2.25    | +     | 10   |
| TFW                                                                                                                           | 551.86       | 2.24    | +     | 11   |
| K <sup>+</sup> /Na <sup>+</sup> _S                                                                                            | 542.39       | 2.2     | +     | 12   |
| Root Na <sup>+</sup>                                                                                                          | 443.92       | 1.8     | +     | 13   |
| RL                                                                                                                            | 388.58       | 1.58    |       | 14   |
| K <sup>+</sup> /Na <sup>+</sup> _R                                                                                            | 367.45       | 1.49    |       | 15   |
| SFW                                                                                                                           | 328.3        | 1.33    |       | 16   |
| RDW                                                                                                                           | 270.54       | 1.1     |       | 17   |
| SL                                                                                                                            | 257.22       | 1.04    |       | 18   |
| Na <sup>+</sup> /Ca <sup>+</sup> _S                                                                                           | 211.25       | 0.86    |       | 19   |
| TDW                                                                                                                           | 196.73       | 0.8     |       | 20   |
| Shoot Na <sup>+</sup>                                                                                                         | 185.5        | 0.75    |       | 21   |
| SDW                                                                                                                           | 146.83       | 0.6     |       | 22   |
| Shoot Ca <sup>+</sup>                                                                                                         | 140.53       | 0.57    |       | 23   |
| RFW                                                                                                                           | 64.77        | 0.26    |       | 24   |
| CHL                                                                                                                           | 64.05        | 0.26    |       | 25   |
| (+) sign represents the significant contribution of traits at $p \leq 0.0001$ level with the respect of salt stress response. |              |         |       |      |
