# Supplementary material for: Comprehensive Evaluation of Morpho-Physiological and Ionic Traits in Wheat (Triticum aestivum L.) Genotypes under Salinity Stress
Source: MDPI journal article supplement (doi:10.3390/agriculture12111765), 2022-10-25
Supplement: s1 [file s1]

**Table S2:** Descriptive statistics of 25 traits measured at vegetative stage among the 44 wheat genotypes (CHL: chlorophyll, MSI: membrane stability index, RFW: Root fresh weight, SFW: Shoot fresh weight, TFW: Total fresh weight, RDW: Root dry weight, SDW: Shoot dry weight, TDW: Total dry weight, R/S: Root/shoot ratio, , RL: Root length, SL: Shoot length, PS: Photosynthetic rate, RWC\_S: Relative water content of shoot, RWC\_R: Relative water content of root, RWC\_T: Total Relative water content, Shoot Na<sup>+</sup>, Root Na<sup>+</sup>, Shoot K<sup>+</sup>, Root K<sup>+</sup>, Shoot Ca<sup>2+</sup>, Root Ca<sup>2+</sup>, K<sup>+</sup>/Na<sup>+</sup>\_S: Shoot K<sup>+</sup>/Na<sup>+</sup>, K<sup>+</sup>/Na<sup>+</sup>\_R: Root K<sup>+</sup>/Na<sup>+</sup>, Na<sup>+</sup>/Ca<sup>2+</sup>\_S: Shoot Na<sup>+</sup>/Ca<sup>2+</sup>, Na<sup>+</sup>/Ca<sup>2+</sup>\_R: Root Na<sup>+</sup>/Ca<sup>2+</sup>.

| S. No | Traits     | Treatments | Min    | Max    | Mean  | SD   | CV (%) | Heritability (h <sup>2</sup> ) |
|-------|------------|------------|--------|--------|-------|------|--------|--------------------------------|
| 1     | CHL (SPAD) | Salt       | 18.86  | 36.82  | 27.84 | 3.1  | 11.02  | 0.73                           |
|       |            | Control    | 24.3   | 37.17  | 30.97 | 2.8  | 9.02   |                                |
| 2     | MSI (ds/m) | Salt       | 19.48  | 76.27  | 44.08 | 13.7 | 31.17  | 0.69                           |
|       |            | Control    | 44.41  | 85.78  | 70.47 | 10.5 | 14.86  |                                |
| 3     | RFW (g)    | Salt       | 0.07   | 0.85   | 0.35  | 0.17 | 49.28  | 0.72                           |
|       |            | Control    | 0.12   | 1.47   | 0.64  | 0.16 | 24.84  |                                |
| 4     | SFW (g)    | Salt       | 0.25   | 1.9    | 0.78  | 0.13 | 16.67  | 0.34                           |
|       |            | Control    | 0.64   | 6.55   | 2.84  | 0.19 | 6.72   |                                |
| 5     | TFW        | Salt       | 0.36   | 2.75   | 1.13  | 0.30 | 26.9   | 0.45                           |
|       |            | Control    | 0.83   | 8      | 3.47  | 0.35 | 10.11  |                                |
| 6     | RDW (g)    | Salt       | 0.02   | 0.12   | 0.06  | 0.03 | 45     | 0.66                           |
|       |            | Control    | 0.03   | 0.25   | 0.09  | 0.02 | 23.33  |                                |
| 7     | SDW (g)    | Salt       | 0.04   | 0.28   | 0.13  | 0.01 | 9.23   | 0.45                           |
|       |            | Control    | 0.11   | 0.79   | 0.29  | 0.01 | 2.75   |                                |
| 8     | TDW        | Salt       | 0.05   | 0.37   | 0.19  | 0.02 | 7.89   | 0.50                           |
|       |            | Control    | 0.13   | 0.9    | 0.38  | 0.01 | 3.42   |                                |
| 9     | R/S        | Salt       | 0.239  | 0.948  | 0.52  | 0.18 | 34.48  | 0.68                           |
|       |            | Control    | 0.14   | 0.738  | 0.39  | 0.16 | 40.25  |                                |
| 10    | RL (cm)    | Salt       | 7.7    | 22.39  | 15.27 | 3.5  | 23.125 | 0.36                           |
|       |            | Control    | 7.9    | 38.09  | 19.87 | 5.1  | 25.49  |                                |
| 11    | SL (cm)    | Salt       | 17.4   | 33.57  | 24.89 | 3.6  | 14.42  | 0.61                           |
|       |            | Control    | 25.59  | 49.81  | 36.34 | 6.5  | 17.92  |                                |
| 12    | PS         | Salt       | 522    | 737    | 682   | 95.3 | 13.97  | 0.30                           |
|       |            | Control    | 699.67 | 772.33 | 740.9 | 14.9 | 2      |                                |

|    |                                      |         |        |        |        |       |        |      |
|----|--------------------------------------|---------|--------|--------|--------|-------|--------|------|
| 13 | RWC_S                                | Salt    | 63.64  | 90.96  | 83.44  | 5.2   | 6.27   | 0.65 |
|    |                                      | Control | 79.05  | 93.09  | 89.56  | 2.8   | 3.073  |      |
| 14 | RWC_R                                | Salt    | 59.84  | 92.24  | 79.27  | 8.1   | 10.2   | 0.79 |
|    |                                      | Control | 57.5   | 92.36  | 81.89  | 7.8   | 9.48   |      |
| 15 | RWC_T                                | Salt    | 62.42  | 89.16  | 82.5   | 5.2   | 6.26   | 0.74 |
|    |                                      | Control | 74.266 | 92.57  | 88.38  | 3.0   | 3.40   |      |
| 16 | Shoot Na <sup>+</sup>                | Salt    | 61.009 | 261.61 | 117.5  | 37.6  | 32.02  | 0.12 |
|    |                                      | Control | 5.16   | 35.69  | 15.01  | 7.6   | 50.68  |      |
| 17 | Root Na <sup>+</sup>                 | Salt    | 34.2   | 173.21 | 75.2   | 25.8  | 34.24  | 0.53 |
|    |                                      | Control | 8.084  | 75.19  | 17.93  | 11.2  | 62.35  |      |
| 18 | Shoot K <sup>+</sup>                 | Salt    | 26.17  | 125.78 | 76.3   | 29.2  | 38.23  | 0.69 |
|    |                                      | Control | 9.02   | 136.48 | 78.21  | 36.6  | 46.82  |      |
| 19 | Root K <sup>+</sup>                  | Salt    | 9.39   | 42.92  | 29.59  | 8.0   | 27     | 0.30 |
|    |                                      | Control | 8.62   | 102.4  | 49.44  | 26.5  | 53.69  |      |
| 20 | Shoot Ca <sup>2+</sup>               | Salt    | 13.847 | 112.76 | 39.63  | 21.9  | 55.168 | 0.70 |
|    |                                      | Control | 6.357  | 82.35  | 31.52  | 18.1  | 57.44  |      |
| 21 | Root Ca <sup>2+</sup>                | Salt    | 150.63 | 1122.8 | 368.21 | 185.6 | 50.41  | 0.74 |
|    |                                      | Control | 70.97  | 996.67 | 344.7  | 189.2 | 54.9   |      |
| 22 | K <sup>+</sup> /Na <sup>+</sup> _S   | Salt    | 0.165  | 1.084  | 0.68   | 0.25  | 36.37  | 0.11 |
|    |                                      | Control | 0.74   | 10.71  | 5.67   | 0.52  | 9.17   |      |
| 23 | K <sup>+</sup> /Na <sup>+</sup> _R   | Salt    | 0.147  | 0.674  | 0.41   | 0.11  | 25.82  | 0.02 |
|    |                                      | Control | 0.324  | 9.295  | 3.26   | 2.00  | 61.31  |      |
| 24 | Na <sup>+</sup> /Ca <sup>2+</sup> _S | Salt    | 1.08   | 8.448  | 3.65   | 1.8   | 47.98  | 0.18 |
|    |                                      | Control | 0.145  | 1.157  | 0.55   | 0.24  | 43.93  |      |
| 25 | Na <sup>+</sup> /Ca <sup>2+</sup> _R | Salt    | 0.073  | 0.754  | 0.25   | 0.14  | 57.89  | 0.57 |
|    |                                      | Control | 0.017  | 0.301  | 0.071  | 0.06  | 86.04  | 0.51 |
